# Supplementary material
Source: PubMed Central journal article supplement (PMC3596960)

## BiRd (clarithromycin, lenalidomide, dexamethasone): An update on long term lenalidomide therapy in previously untreated patients with multiple myeloma

Adriana Rossi<sup>1</sup>, Tomer Mark<sup>1</sup>, David Jayabalan<sup>1,2</sup>, Paul Christos<sup>3</sup>, Faiza Zafar<sup>1</sup>, Karen Pekle<sup>1</sup>, Roger Pearse<sup>1</sup>, Selina Chen-Kiang<sup>2</sup>, Morton Coleman<sup>1</sup>, and Ruben Niesvizky<sup>1</sup>

<sup>1</sup>Division of Hematology and Medical Oncology, Department of Medicine, Myeloma Center, Weill Cornell Medical College, New York Presbyterian Hospital, NY, USA; <sup>2</sup> Department of Pathology and Laboratory Medicine, Weill Cornell Medical College, NY, USA; <sup>3</sup> Division of Biostatistics and Epidemiology, Department of Public Health, Weill Cornell Medical College, NY, USA.

**Table S1 – Patient Characteristics**

| Characteristic                                  | N = 72     |
|-------------------------------------------------|------------|
| <b>Median age, years (range)</b>                | 63 (36-83) |
| <b>Sex, n (%)</b>                               |            |
| Male                                            | 41 (57)    |
| Female                                          | 31 (43)    |
| <b>ISS classification, n (%)</b>                |            |
| Stage I                                         | 33 (46)    |
| Stage II                                        | 26 (36)    |
| Stage III                                       | 13 (18)    |
| <b>Immunoglobulins, heavy-chain type, n (%)</b> |            |
| IgA                                             | 16 (22)    |
| IgG                                             | 44 (61)    |
| Bence Jones protein                             | 12 (17)    |
| <b>Prior Malignancies</b>                       |            |
| Breast cancer                                   | 3          |
| Prostate cancer                                 | 3          |
| Melanoma                                        | 2          |
| Lymphoma                                        | 1          |
| Skin SCC                                        | 1          |
| Skin BCC                                        | 1          |

Figure S1. Patient Disposition

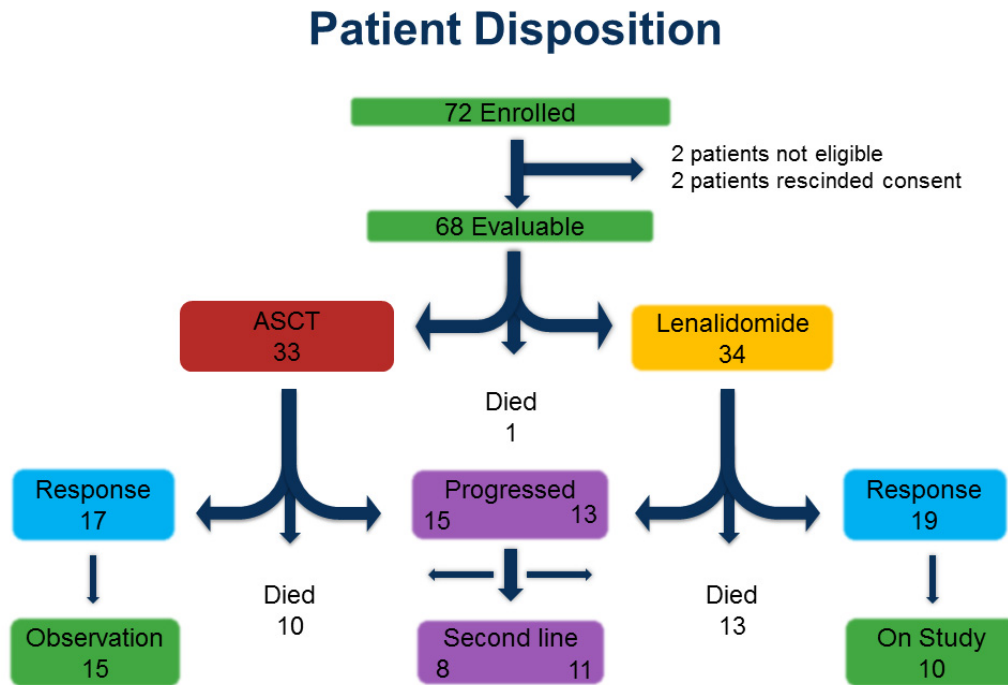

Supplement: supp_blood-2012-08-448563_blood-2012-08-448563-1.pdf [file supp_blood-2012-08-448563_blood-2012-08-448563-1.pdf]
